# Supplementary material for: Heritable Genome Editing with CRISPR/Cas9 in the Silkworm, Bombyx mori
Source: PLOS journal article supplement (doi:10.1371/journal.pone.0101210), 2014-07-11
Supplement: S9 (10.1371/journal.pone.0101210.s009) [file journal.pone.0101210.s009]

**Table S3** Mutations induced by microinjection of Cas9/sgRNA in G<sub>0</sub>

| Target gene  | Embryos Injected (n) | Total sequencing number (n) | Mutant number by sequencing (n) | Frequency of mutation in G <sub>0</sub> |
|--------------|----------------------|-----------------------------|---------------------------------|-----------------------------------------|
| <i>BmKMO</i> | 437                  | 20                          | 7                               | 35.0% (7/20)                            |
| <i>BmTH</i>  | 136                  | 24                          | 8                               | 33.3% (8/24)                            |
| <i>Bmtan</i> | 473                  | 6                           | 1                               | 16.7% (1/6)                             |
